# Supplementary material
Source: publisher site journal article supplement (https://www.dovepress.com/get_supplementary_file.php?f=245267.xlsx)
Supplement: Supplementary file 1 [file get_supplementary_file.php]

## Sheet: S1. HNSC-Positive 121
Table S1. Gene signatures positively associated with CHK2 in HNSC
Query	Statistic	P-value	FDR (BH)	Event_SD	Event_TD
UBE2T	0.681042	4.00211e-72	4.03493e-68	520	520
CDC45	0.66664	4.0853e-68	2.74586e-64	520	520
HSCB	0.647091	5.09275e-63	2.56726e-59	520	520
NR2C2AP	0.644048	2.92853e-62	1.18102e-58	520	520
CENPM	0.643091	5.05557e-62	1.69901e-58	520	520
LOC284900	0.627932	2.24034e-58	5.64677e-55	520	520
HAUS8	0.621195	8.07467e-57	1.80908e-53	520	520
CKS1B	0.6203	1.29092e-56	2.60302e-53	520	520
RFC4	0.605792	2.12387e-53	3.89324e-50	520	520
CCDC150	0.601983	1.39441e-52	2.16284e-49	520	520
C16orf59	0.599729	4.19704e-52	6.04494e-49	520	520
C12orf47	0.599199	5.43133e-52	7.30116e-49	520	520
PHF5A	0.589658	5.18534e-50	6.53483e-47	520	520
POLR2H	0.588597	8.52977e-50	1.01173e-46	520	520
RANBP1	0.587989	1.13393e-49	1.27025e-46	520	520
NUF2	0.586782	1.99003e-49	2.11195e-46	520	520
SLC25A33	0.586615	2.15148e-49	2.16912e-46	520	520
RNASEH2A	0.585216	4.11677e-49	3.95288e-46	520	520
EME1	0.579255	6.31167e-48	5.78493e-45	520	520
CACYBP	0.578005	1.11095e-47	9.33383e-45	520	520
RAD54L	0.576866	1.85533e-47	1.49644e-44	520	520
MND1	0.576267	2.42797e-47	1.88298e-44	520	520
LSM4	0.575114	4.06982e-47	3.03941e-44	520	520
SNRPD3	0.574279	5.90665e-47	4.25363e-44	520	520
TRAIP	0.573316	9.06622e-47	6.30384e-44	520	520
RFC2	0.572456	1.32757e-46	8.92306e-44	520	520
CECR5	0.572051	1.58788e-46	1.03284e-43	520	520
CDK1	0.568485	7.6112e-46	4.61231e-43	520	520
SUZ12P	0.568436	7.77715e-46	4.61231e-43	520	520
TMEM183A	0.566226	2.0338e-45	1.1717e-42	520	520
ILF2	0.564071	5.15963e-45	2.81186e-42	520	520
NDUFA6	0.563453	6.72851e-45	3.57036e-42	520	520
C1orf112	0.563125	7.74498e-45	4.00435e-42	520	520
MRPL34	0.561284	1.70199e-44	8.37046e-42	520	520
RAD51C	0.560408	2.47074e-44	1.18619e-41	520	520
CDK4	0.559641	3.42116e-44	1.60429e-41	520	520
C21orf45	0.558378	5.83734e-44	2.67509e-41	520	520
C2orf64	0.55546	1.98806e-43	8.90826e-41	520	520
FANCL	0.555219	2.1981e-43	9.63534e-41	520	520
TROAP	0.554164	3.41251e-43	1.43354e-40	520	520
NHP2L1	0.55289	5.79096e-43	2.38304e-40	520	520
C1orf77	0.552166	7.81494e-43	3.15161e-40	520	520
KIF22	0.550312	1.67708e-42	6.63071e-40	520	520
NCAPH2	0.550069	1.85313e-42	7.18588e-40	520	520
SFI1	0.548961	2.91716e-42	1.08929e-39	520	520
HSPE1	0.545412	1.23437e-41	4.52544e-39	520	520
LOC339674	0.544706	1.64096e-41	5.90865e-39	520	475
IQCC	0.544117	2.0806e-41	7.36023e-39	520	520
C17orf53	0.540226	9.84688e-41	3.42332e-38	520	520
PSMC3IP	0.539302	1.42032e-40	4.85412e-38	520	520
JTB	0.539197	1.48066e-40	4.93579e-38	520	520
ABHD11	0.539176	1.49317e-40	4.93579e-38	520	520
SFRS3	0.538404	2.02576e-40	6.58829e-38	520	520
SNRPE	0.53795	2.42235e-40	7.75306e-38	520	520
DSCC1	0.536781	3.83666e-40	1.20879e-37	520	520
LOC81691	0.53673	3.91362e-40	1.21406e-37	520	520
SMARCB1	0.536408	4.44091e-40	1.35677e-37	520	520
OIP5	0.536198	4.82155e-40	1.45107e-37	520	520
C16orf75	0.536155	4.90281e-40	1.45383e-37	520	520
TOMM22	0.535667	5.93408e-40	1.73413e-37	520	520
LOC100216545	0.535325	6.78327e-40	1.95397e-37	520	520
C6orf162	0.534748	8.4948e-40	2.38963e-37	520	520
C19orf48	0.534737	8.53269e-40	2.38963e-37	520	520
POLR2F	0.533275	1.5064e-39	4.10474e-37	520	520
DRG1	0.53053	4.34799e-39	1.15244e-36	520	520
LOC642846	0.530498	4.40079e-39	1.15244e-36	520	520
MED30	0.530409	4.5544e-39	1.17737e-36	520	520
CENPH	0.529813	5.7251e-39	1.46128e-36	520	520
MCM5	0.528158	1.07795e-38	2.68343e-36	520	520
ZNF789	0.527546	1.3606e-38	3.28811e-36	520	520
PAFAH1B3	0.527529	1.36978e-38	3.28811e-36	520	520
C18orf56	0.525191	3.3223e-38	7.88128e-36	520	520
SFRS7	0.524261	4.71762e-38	1.10612e-35	520	520
SPC25	0.523698	5.82904e-38	1.351e-35	520	520
FBL	0.523069	7.38178e-38	1.69143e-35	520	520
RBMX	0.52246	9.27423e-38	2.10119e-35	520	520
LSM2	0.521569	1.29354e-37	2.89811e-35	520	520
C12orf73	0.521444	1.35554e-37	2.971e-35	520	520
DUT	0.519973	2.3426e-37	5.07915e-35	520	520
H2AFZ	0.519579	2.71118e-37	5.81576e-35	520	520
CDCA3	0.518947	3.4253e-37	7.27028e-35	520	520
NEK2	0.518625	3.8577e-37	8.10278e-35	520	520
GTPBP3	0.518238	4.45018e-37	9.25087e-35	520	520
CCDC77	0.518199	4.51491e-37	9.28966e-35	520	520
RECQL4	0.517038	6.92305e-37	1.41006e-34	520	520
DDT	0.515957	1.02934e-36	2.07557e-34	520	520
CKS2	0.51527	1.32339e-36	2.64206e-34	520	520
FAM195A	0.515202	1.35671e-36	2.68202e-34	520	520
RAD51	0.515015	1.45244e-36	2.82728e-34	520	520
RPAIN	0.514996	1.46235e-36	2.82728e-34	520	520
NUDT1	0.514978	1.47225e-36	2.82728e-34	520	520
CCT6P1	0.514138	1.99921e-36	3.77662e-34	520	520
STMN1	0.514132	2.00406e-36	3.77662e-34	520	520
PIF1	0.513311	2.70083e-36	5.04255e-34	520	520
C1orf35	0.511397	5.3975e-36	9.98487e-34	520	520
GINS2	0.5108	6.69349e-36	1.22698e-33	520	520
SNHG1	0.509074	1.2434e-35	2.23857e-33	520	520
MCM7	0.50904	1.25873e-35	2.24611e-33	520	520
FAM165B	0.508804	1.36952e-35	2.42237e-33	520	520
BOLA1	0.508489	1.53291e-35	2.66461e-33	520	520
RAD54B	0.507508	2.17433e-35	3.74728e-33	520	520
AURKB	0.506899	2.70079e-35	4.57761e-33	520	520
CDC6	0.506898	2.70153e-35	4.57761e-33	520	520
HNRNPA3	0.506816	2.78176e-35	4.67428e-33	520	520
DDX12	0.506722	2.8759e-35	4.79253e-33	520	520
CCDC58	0.506426	3.19489e-35	5.28047e-33	520	520
TOR3A	0.506393	3.23177e-35	5.29801e-33	520	520
ITGB3BP	0.506302	3.33792e-35	5.42789e-33	520	520
SNRPD1	0.505353	4.67138e-35	7.5355e-33	520	520
FAM72B	0.505293	4.77039e-35	7.63415e-33	520	520
DCTPP1	0.505046	5.20681e-35	8.26693e-33	520	520
SLC27A5	0.504724	5.83172e-35	9.11557e-33	520	520
C19orf42	0.503886	7.83703e-35	1.21558e-32	520	520
KHK	0.503573	8.74802e-35	1.34653e-32	520	520
FAM54A	0.503081	1.03981e-34	1.58839e-32	520	520
MRPS9	0.501858	1.59552e-34	2.38311e-32	520	520
SRP9	0.501815	1.61963e-34	2.40134e-32	520	520
SUV39H2	0.501531	1.78841e-34	2.63223e-32	520	520
FAM64A	0.501094	2.08304e-34	3.04365e-32	520	520
PHOSPHO2	0.500751	2.34734e-34	3.40516e-32	520	520
C17orf86	0.500688	2.39941e-34	3.45583e-32	520	520
The gene signatures positively associated with CHK2 are defined as significantly associated genes (Statistic correlation > 0.5) in HNSC.

## Sheet: S2. HNSC-Negtive 297
Table S2. Gene signatures negtively associated with CHK2 in HNSC
Query	Statistic	P-value	FDR (BH)	Event_SD	Event_TD
MYO1B	-0.400169	2.03347e-21	4.1417e-20	520	520
PJA2	-0.400566	1.84171e-21	3.76635e-20	520	520
PRNP	-0.40087	1.70738e-21	3.50229e-20	520	520
PLIN3	-0.401368	1.5072e-21	3.11704e-20	520	520
FAM63B	-0.402116	1.2497e-21	2.61401e-20	520	520
DPYD	-0.402362	1.17503e-21	2.47838e-20	520	520
BMPR2	-0.402428	1.15547e-21	2.44223e-20	520	520
ODZ3	-0.402429	1.15524e-21	2.44223e-20	520	520
NCDN	-0.402441	1.15175e-21	2.43949e-20	520	520
RNF152	-0.402567	1.11586e-21	2.36596e-20	520	520
TGFBI	-0.402644	1.09459e-21	2.32575e-20	520	520
BACH1	-0.402923	1.02047e-21	2.18039e-20	520	520
PTRF	-0.40324	9.42182e-22	2.02539e-20	520	520
WNT7A	-0.403342	9.18315e-22	1.97619e-20	520	511
PAFAH1B2	-0.403513	8.79503e-22	1.89672e-20	520	520
VPS13C	-0.403583	8.64059e-22	1.86941e-20	520	520
ARAP2	-0.403619	8.56249e-22	1.8545e-20	520	520
LEPROT	-0.403832	8.11527e-22	1.75953e-20	520	520
TRIP12	-0.404928	6.1503e-22	1.34215e-20	520	520
FAM114A1	-0.4051	5.88814e-22	1.28913e-20	520	520
CSPG4	-0.405209	5.72763e-22	1.25535e-20	520	520
GPR115	-0.405217	5.71658e-22	1.25429e-20	520	519
SNX33	-0.405279	5.62788e-22	1.23617e-20	520	520
RC3H2	-0.405345	5.53376e-22	1.21815e-20	520	520
GALNT6	-0.405525	5.28741e-22	1.16647e-20	520	520
AMOTL1	-0.405868	4.84614e-22	1.07264e-20	520	520
HCFC2	-0.406201	4.45197e-22	9.90834e-21	520	520
RAB11FIP5	-0.406237	4.41205e-22	9.83034e-21	520	520
ZFYVE1	-0.406396	4.23718e-22	9.48264e-21	520	520
CRIM1	-0.406453	4.17609e-22	9.37713e-21	520	520
LOC554202	-0.406628	3.99408e-22	8.9985e-21	520	516
TADA2B	-0.407187	3.46278e-22	7.83653e-21	520	520
STARD13	-0.407513	3.18679e-22	7.2363e-21	520	520
PRSS23	-0.407516	3.18418e-22	7.2363e-21	520	520
DCAF5	-0.407724	3.01892e-22	6.88614e-21	520	520
RNF11	-0.408013	2.80372e-22	6.43165e-21	520	520
EPGN	-0.408335	2.58196e-22	5.93646e-21	520	491
PDLIM5	-0.408415	2.52937e-22	5.82216e-21	520	520
STIM1	-0.408752	2.32019e-22	5.35903e-21	520	520
PLA2G4E	-0.408938	2.21184e-22	5.13228e-21	520	512
GLI3	-0.409007	2.17316e-22	5.04834e-21	520	520
SLC25A46	-0.409106	2.11884e-22	4.92782e-21	520	520
PIK3CD	-0.409108	2.11745e-22	4.92782e-21	520	520
TLN1	-0.409267	2.03303e-22	4.75018e-21	520	520
MYH9	-0.409434	1.94719e-22	4.56018e-21	520	520
MPZL3	-0.409589	1.87142e-22	4.38782e-21	520	520
CDC42BPB	-0.409643	1.84549e-22	4.33206e-21	520	520
CPA4	-0.409795	1.77436e-22	4.16995e-21	520	520
APP	-0.409995	1.6856e-22	3.96599e-21	520	520
DSC1	-0.410055	1.6596e-22	3.90937e-21	520	505
LIPK	-0.410606	1.43989e-22	3.40376e-21	520	457
DSP	-0.410727	1.3954e-22	3.30244e-21	520	520
ENAH	-0.411032	1.28958e-22	3.0628e-21	520	520
DCBLD1	-0.41105	1.28368e-22	3.05238e-21	520	520
DOCK9	-0.411113	1.26303e-22	3.01037e-21	520	520
ANKHD1-EIF4EBP3	-0.411381	1.17828e-22	2.83181e-21	520	520
KIRREL	-0.411503	1.14168e-22	2.74711e-21	520	520
DDX60L	-0.412954	7.83229e-23	1.91199e-21	520	520
ANTXR2	-0.413517	6.76391e-23	1.66937e-21	520	520
TMCC3	-0.413553	6.7014e-23	1.65597e-21	520	520
TBC1D2B	-0.413804	6.27717e-23	1.55495e-21	520	520
ATG2A	-0.413894	6.13015e-23	1.52227e-21	520	520
ZFYVE26	-0.413954	6.03609e-23	1.50076e-21	520	520
NFATC2	-0.414024	5.92647e-23	1.47533e-21	520	507
ENTPD7	-0.414043	5.89658e-23	1.4697e-21	520	520
OGDH	-0.414089	5.82608e-23	1.45392e-21	520	520
UBR4	-0.414194	5.66814e-23	1.41626e-21	520	520
WWC2	-0.414415	5.34983e-23	1.34172e-21	520	520
MCTP1	-0.41461	5.08409e-23	1.28022e-21	520	520
C13orf29	-0.41483	4.7997e-23	1.22044e-21	520	520
ATG2B	-0.41496	4.63897e-23	1.18106e-21	520	520
C17orf103	-0.415239	4.31219e-23	1.09925e-21	520	520
NOD2	-0.415296	4.2484e-23	1.08436e-21	520	520
GCNT4	-0.416102	3.43706e-23	8.82866e-22	520	519
PTPN1	-0.416558	3.04847e-23	7.85049e-22	520	520
LIMA1	-0.41658	3.03112e-23	7.81579e-22	520	520
MCC	-0.416773	2.88052e-23	7.47528e-22	520	520
GALNT10	-0.416992	2.71915e-23	7.0747e-22	520	520
ZCCHC6	-0.417352	2.47263e-23	6.47507e-22	520	520
GSDMA	-0.417465	2.40009e-23	6.2994e-22	520	519
RGP1	-0.417559	2.34111e-23	6.15465e-22	520	520
CDSN	-0.417896	2.14123e-23	5.6439e-22	520	520
KIAA1033	-0.418138	2.00828e-23	5.32127e-22	520	520
ZNF710	-0.418142	2.0064e-23	5.32127e-22	520	520
SLC24A3	-0.418486	1.83169e-23	4.89843e-22	520	520
PRDM4	-0.418589	1.78227e-23	4.77261e-22	520	520
PDZD8	-0.418636	1.76018e-23	4.72599e-22	520	520
DSG1	-0.418803	1.68383e-23	4.53308e-22	520	520
VCL	-0.418839	1.6677e-23	4.49565e-22	520	520
CSNK1A1	-0.418959	1.61534e-23	4.36034e-22	520	520
MFAP3	-0.419137	1.54073e-23	4.1701e-22	520	520
ARHGAP32	-0.419336	1.46164e-23	3.96137e-22	520	520
MTF1	-0.419606	1.36022e-23	3.69642e-22	520	520
TMEM86A	-0.41961	1.3586e-23	3.69642e-22	520	520
IQGAP1	-0.420142	1.17925e-23	3.23076e-22	520	520
RBMS2	-0.420177	1.16839e-23	3.20536e-22	520	520
CAV1	-0.420491	1.07448e-23	2.96386e-22	520	520
SLC12A4	-0.420835	9.80034e-24	2.72571e-22	520	520
COL12A1	-0.421112	9.10069e-24	2.53812e-22	520	520
TSPAN5	-0.421486	8.2351e-24	2.2999e-22	520	520
EHD4	-0.421589	8.01081e-24	2.24659e-22	520	520
ERC1	-0.421668	7.84157e-24	2.20219e-22	520	520
MYOM3	-0.421694	7.78718e-24	2.18997e-22	520	520
RRAGC	-0.421805	7.56034e-24	2.13511e-22	520	520
BBOX1	-0.421999	7.17645e-24	2.03239e-22	520	517
GPR1	-0.42227	6.67271e-24	1.9004e-22	520	518
LIG4	-0.422512	6.25263e-24	1.79088e-22	520	520
NIPAL4	-0.422604	6.10013e-24	1.75468e-22	520	519
P704P	-0.422689	5.96243e-24	1.71998e-22	520	520
2019-09-08	-0.42283	5.74056e-24	1.65835e-22	520	520
C11orf63	-0.423226	5.16033e-24	1.49501e-22	520	519
NAV3	-0.423413	4.90634e-24	1.42758e-22	520	520
USP38	-0.423551	4.72723e-24	1.37745e-22	520	520
C14orf43	-0.423574	4.69795e-24	1.37091e-22	520	520
ARSI	-0.423809	4.40938e-24	1.29231e-22	520	520
SEC31A	-0.423935	4.26197e-24	1.25457e-22	520	520
MAST4	-0.424158	4.01282e-24	1.18469e-22	520	520
PTGFRN	-0.424232	3.93349e-24	1.16298e-22	520	520
NEDD4	-0.424552	3.60726e-24	1.07123e-22	520	520
EFNB2	-0.424753	3.4162e-24	1.01749e-22	520	520
SLK	-0.425225	3.00599e-24	9.01976e-23	520	520
REEP3	-0.425606	2.71049e-24	8.1818e-23	520	520
DCTN1	-0.425699	2.64295e-24	8.00187e-23	520	520
KRT6A	-0.427435	1.64721e-24	5.08643e-23	520	520
C2orf18	-0.427466	1.63314e-24	5.0507e-23	520	520
UBR1	-0.427721	1.52325e-24	4.73263e-23	520	520
EREG	-0.427807	1.48796e-24	4.63011e-23	520	519
KCTD12	-0.428258	1.31505e-24	4.1111e-23	520	520
RAPGEF2	-0.428395	1.26685e-24	3.98514e-23	520	520
MLXIP	-0.429133	1.03459e-24	3.28526e-23	520	520
EEA1	-0.4304	7.29823e-25	2.3322e-23	520	520
TMEM154	-0.430793	6.54827e-25	2.10589e-23	520	520
EHBP1L1	-0.430846	6.45179e-25	2.0815e-23	520	520
ITGA3	-0.430982	6.21429e-25	2.00809e-23	520	520
ZHX1	-0.431028	6.13571e-25	1.98588e-23	520	520
KIFC3	-0.431626	5.19986e-25	1.69113e-23	520	520
WNK1	-0.432374	4.22619e-25	1.38339e-23	520	520
PNLIPRP3	-0.432902	3.64829e-25	1.20597e-23	520	475
SFXN3	-0.434328	2.45122e-25	8.37736e-24	520	520
HEPHL1	-0.434411	2.39526e-25	8.19999e-24	520	520
NIPAL1	-0.434699	2.20995e-25	7.59139e-24	520	520
EPAS1	-0.435491	1.7699e-25	6.13202e-24	520	520
MYOF	-0.435559	1.73662e-25	6.03744e-24	520	520
CHST11	-0.435805	1.62042e-25	5.65295e-24	520	520
AP2A1	-0.436781	1.23127e-25	4.35568e-24	520	520
CYP26B1	-0.437405	1.03256e-25	3.67855e-24	520	520
FLRT2	-0.437421	1.02803e-25	3.6689e-24	520	520
DYSF	-0.437936	8.88805e-26	3.18328e-24	520	520
FLII	-0.437995	8.74008e-26	3.13585e-24	520	520
ANO6	-0.438	8.72709e-26	3.13585e-24	520	520
THBS1	-0.438281	8.05947e-26	2.91239e-24	520	520
FURIN	-0.438464	7.65392e-26	2.77579e-24	520	520
HTR7	-0.438921	6.72332e-26	2.46042e-24	520	520
KLF7	-0.438968	6.63356e-26	2.43198e-24	520	520
SPTAN1	-0.439009	6.55731e-26	2.4128e-24	520	520
PI4K2A	-0.439182	6.24181e-26	2.30936e-24	520	520
ARHGEF12	-0.439515	5.67909e-26	2.11279e-24	520	520
CARD6	-0.439894	5.09834e-26	1.90729e-24	520	520
MAN2A1	-0.440222	4.64267e-26	1.75637e-24	520	520
LYST	-0.440295	4.54704e-26	1.72464e-24	520	520
FRYL	-0.440324	4.50991e-26	1.71581e-24	520	520
CCRN4L	-0.440357	4.46835e-26	1.70321e-24	520	520
RTN4	-0.440412	4.39842e-26	1.67973e-24	520	520
GJB2	-0.440513	4.27343e-26	1.6382e-24	520	520
CAP1	-0.440564	4.21116e-26	1.61741e-24	520	520
ELL2	-0.44067	4.08549e-26	1.58119e-24	520	520
KIAA1644	-0.440773	3.96804e-26	1.53868e-24	520	520
MYO1C	-0.440822	3.91241e-26	1.52004e-24	520	520
PCDHGC3	-0.441065	3.64985e-26	1.43461e-24	520	520
TPP1	-0.44135	3.36381e-26	1.32736e-24	520	520
KIF1C	-0.441445	3.27416e-26	1.29451e-24	520	520
MBNL2	-0.441563	3.16523e-26	1.25637e-24	520	520
ACTN1	-0.441626	3.10855e-26	1.23631e-24	520	520
GPR68	-0.442543	2.38993e-26	9.67682e-25	520	520
FMN1	-0.442849	2.18863e-26	8.91545e-25	520	514
LRRFIP1	-0.44315	2.00706e-26	8.25928e-25	520	520
NRIP1	-0.443362	1.88827e-26	7.8344e-25	520	520
SLC7A1	-0.444351	1.41927e-26	5.97458e-25	520	520
EHD1	-0.444967	1.1875e-26	5.00937e-25	520	520
KLHL18	-0.44509	1.14625e-26	4.86588e-25	520	520
HTT	-0.445411	1.04419e-26	4.46083e-25	520	520
KRT6B	-0.445576	9.95437e-27	4.27974e-25	520	520
CDH3	-0.445802	9.32228e-27	4.02702e-25	520	520
FLRT3	-0.446532	7.53962e-27	3.30498e-25	520	519
ARHGAP17	-0.446922	6.7297e-27	2.96283e-25	520	520
MSN	-0.44704	6.5031e-27	2.86933e-25	520	520
KIAA0513	-0.447151	6.29607e-27	2.78408e-25	520	520
PLEKHM2	-0.447857	5.12164e-27	2.27975e-25	520	520
APBB2	-0.447976	4.9465e-27	2.21156e-25	520	520
ITPRIP	-0.448945	3.72413e-27	1.68371e-25	520	520
KANK1	-0.449299	3.35654e-27	1.53125e-25	520	520
MYO1E	-0.449775	2.9182e-27	1.34344e-25	520	520
GPR157	-0.449814	2.88508e-27	1.33123e-25	520	520
KIF13A	-0.449848	2.85607e-27	1.32087e-25	520	520
PRIC285	-0.449984	2.74441e-27	1.27508e-25	520	520
SEC24A	-0.450496	2.35984e-27	1.11177e-25	520	520
PRRG1	-0.453159	1.07211e-27	5.19664e-26	520	520
AP4E1	-0.453428	9.89536e-28	4.82708e-26	520	520
LHX1	-0.453912	8.56604e-28	4.23347e-26	520	424
FLNB	-0.454237	7.7746e-28	3.87079e-26	520	520
DAAM1	-0.454249	7.747e-28	3.86659e-26	520	520
KIF1B	-0.454518	7.14826e-28	3.59445e-26	520	520
MICAL2	-0.454839	6.49404e-28	3.27365e-26	520	520
CASP14	-0.456119	4.42394e-28	2.26407e-26	520	465
PPP1R9B	-0.457546	2.87899e-28	1.50168e-26	520	520
RUNDC2A	-0.460336	1.23509e-28	6.69474e-27	520	518
TANC2	-0.461121	9.72014e-29	5.34052e-27	520	520
SLC30A4	-0.462362	6.64713e-29	3.76496e-27	520	520
SLC38A7	-0.462405	6.56162e-29	3.727e-27	520	520
SLC9A1	-0.462412	6.54686e-29	3.727e-27	520	520
INHBA	-0.463682	4.43074e-29	2.58212e-27	520	520
FBLIM1	-0.463799	4.27382e-29	2.50515e-27	520	520
TSC22D2	-0.46431	3.65058e-29	2.15866e-27	520	520
PTPN21	-0.464319	3.64047e-29	2.15866e-27	520	520
TAOK3	-0.46498	2.9678e-29	1.77575e-27	520	520
FAM83G	-0.465232	2.74528e-29	1.64749e-27	520	520
KRT6C	-0.465359	2.63931e-29	1.59338e-27	520	520
THSD1	-0.465558	2.48126e-29	1.50699e-27	520	520
ASAM	-0.465668	2.39819e-29	1.46982e-27	520	520
SLC6A11	-0.466159	2.05922e-29	1.27369e-27	520	499
PINK1	-0.466387	1.91843e-29	1.19041e-27	520	520
SLC31A2	-0.466553	1.82153e-29	1.13713e-27	520	520
GBF1	-0.467259	1.46209e-29	9.24188e-28	520	520
VPS13D	-0.467644	1.29658e-29	8.29977e-28	520	520
ZNF319	-0.467732	1.2616e-29	8.10157e-28	520	520
IRS1	-0.468811	9.00116e-30	5.87377e-28	520	520
ODZ2	-0.469577	7.07821e-30	4.66422e-28	520	520
INPP4B	-0.469959	6.27754e-30	4.15813e-28	520	520
AFF4	-0.470877	4.70191e-30	3.19093e-28	520	520
USP2	-0.471014	4.50306e-30	3.06756e-28	520	520
FRMD4B	-0.471074	4.41847e-30	3.02014e-28	520	520
SERINC3	-0.471802	3.50988e-30	2.44045e-28	520	520
PLK2	-0.472449	2.85956e-30	1.99516e-28	520	520
PICALM	-0.474278	1.59806e-30	1.14673e-28	520	520
SEMA3C	-0.47478	1.36155e-30	9.98335e-29	520	520
EHD2	-0.475472	1.09108e-30	8.20748e-29	520	520
USP47	-0.475586	1.05195e-30	7.97428e-29	520	520
PLBD2	-0.475599	1.04739e-30	7.96967e-29	520	520
SLC35D1	-0.475953	9.35161e-31	7.1698e-29	520	520
ZHX3	-0.476558	7.69986e-31	5.92596e-29	520	520
PTPRE	-0.477688	5.35065e-31	4.14963e-29	520	520
AHNAK2	-0.477872	5.04299e-31	3.92613e-29	520	520
LRP10	-0.477889	5.01476e-31	3.91929e-29	520	520
PCDH7	-0.478463	4.16531e-31	3.2937e-29	520	520
CAB39	-0.479301	3.17556e-31	2.56032e-29	520	520
SIRPA	-0.480249	2.33363e-31	1.91282e-29	520	520
PDCD6IP	-0.480936	1.86562e-31	1.53545e-29	520	520
CPEB2	-0.481401	1.60296e-31	1.33013e-29	520	520
ARHGAP1	-0.481944	1.34218e-31	1.11834e-29	520	520
TLL1	-0.48256	1.09712e-31	9.37384e-30	520	519
HERC3	-0.482586	1.08761e-31	9.33217e-30	520	520
JAK1	-0.482962	9.61497e-32	8.28531e-30	520	520
ZNFX1	-0.483337	8.50023e-32	7.38787e-30	520	520
CLIP1	-0.484389	6.01201e-32	5.34036e-30	520	520
FYCO1	-0.484947	4.99951e-32	4.46062e-30	520	520
ITPR2	-0.485214	4.57714e-32	4.12025e-30	520	520
MACF1	-0.485468	4.20928e-32	3.80609e-30	520	520
SNX29	-0.485884	3.667e-32	3.33069e-30	520	520
SPTLC3	-0.486263	3.23391e-32	2.95061e-30	520	519
MAN1A1	-0.486725	2.77338e-32	2.62546e-30	520	520
SGMS2	-0.487096	2.45123e-32	2.38775e-30	520	520
LATS2	-0.487326	2.27077e-32	2.23355e-30	520	520
SAMD9	-0.487433	2.19123e-32	2.16588e-30	520	520
KLF10	-0.488156	1.72195e-32	1.71888e-30	520	520
FNIP2	-0.488333	1.62309e-32	1.62826e-30	520	520
SIRPB1	-0.489004	1.29669e-32	1.31389e-30	520	519
MAP7D1	-0.489476	1.10667e-32	1.13851e-30	520	520
TNKS1BP1	-0.489547	1.08096e-32	1.12353e-30	520	520
N4BP1	-0.490218	8.62576e-33	9.25159e-31	520	520
MYO5A	-0.490376	8.17925e-33	8.81959e-31	520	520
ADD1	-0.490943	6.7591e-33	7.48848e-31	520	520
ETS1	-0.492502	3.99106e-33	4.47087e-31	520	520
FAM38A	-0.493205	3.14389e-33	3.62249e-31	520	520
SORCS2	-0.495523	1.42661e-33	1.74341e-31	520	520
BMP2K	-0.495631	1.37498e-33	1.71143e-31	520	520
ADAMTS15	-0.495805	1.29524e-33	1.62219e-31	520	508
ELK3	-0.495867	1.26788e-33	1.6079e-31	520	520
KCTD10	-0.495869	1.26729e-33	1.6079e-31	520	520
ENDOD1	-0.499091	4.17685e-34	5.72938e-32	520	520
ADCY7	-0.502298	1.36801e-34	2.05855e-32	520	520
SIK3	-0.502837	1.13264e-34	1.71719e-32	520	520
ATP10D	-0.504819	5.64019e-35	8.88506e-33	520	520
PLEC	-0.508613	1.46607e-35	2.57059e-33	520	520
PCDHGC5	-0.509932	9.14205e-36	1.66072e-33	520	506
LUZP1	-0.521446	1.35428e-37	2.971e-35	520	520
PANX1	-0.528009	1.14077e-38	2.80518e-36	520	520
CPEB4	-0.529533	6.37246e-39	1.60618e-36	520	520
CYLD	-0.532594	1.9614e-39	5.27328e-37	520	520
KIAA1609	-0.534146	1.07398e-39	2.96654e-37	520	520
BCL9L	-0.5491	2.75614e-42	1.04858e-39	520	520
TGFBR2	-0.554293	3.23429e-43	1.38758e-40	520	520
MYO18A	-0.562948	8.35603e-45	4.21228e-42	520	520
VDR	-0.564656	4.01044e-45	2.24629e-42	520	520
AHNAK	-0.571265	2.24684e-46	1.41579e-43	520	520
MAP4	-0.578271	9.85188e-48	8.6371e-45	520	520
MICALCL	-0.604106	4.90121e-53	8.23567e-50	520	519
NDST1	-0.62991	7.69051e-59	2.21531e-55	520	520
The gene signatures negtively associated with CHK2 are defined as significantly associated genes (Statistic correlation < -0.4) in HNSC.

## Sheet: S3. ESCA-Positive 105
Table S3. Gene signatures positively associated with CHK2 in ESCA
Query	Statistic	P-value	FDR (BH)	Event_SD	Event_TD
CDC45	0.719771	1.15734e-30	1.16544e-26	184	184
DRG1	0.638778	1.74322e-22	1.17028e-18	184	184
BUB1B	0.632913	5.49675e-22	2.76761e-18	184	184
C15orf23	0.621355	4.92393e-21	1.98336e-17	184	184
RAD51	0.608589	5.00249e-20	1.67917e-16	184	184
RANBP1	0.606986	6.64387e-20	1.73335e-16	184	184
NIPSNAP1	0.606784	6.88522e-20	1.73335e-16	184	184
C21orf45	0.604636	1.00418e-19	2.24713e-16	184	184
RAD54B	0.596613	4.01137e-19	8.07891e-16	184	184
NUSAP1	0.595075	5.20866e-19	9.2492e-16	184	184
HMGB3	0.594741	5.51094e-19	9.2492e-16	184	184
SNRPD3	0.590833	1.06249e-18	1.64604e-15	184	184
ORC6L	0.58983	1.25565e-18	1.80635e-15	184	184
AURKB	0.578232	8.31584e-18	1.11654e-14	184	184
VRK1	0.577777	8.94122e-18	1.12548e-14	184	184
TTK	0.575017	1.38595e-17	1.64195e-14	184	184
RFC4	0.573584	1.73708e-17	1.91847e-14	184	184
UNG	0.573323	1.80987e-17	1.91847e-14	184	184
MCM5	0.571	2.60366e-17	2.53448e-14	184	184
HSCB	0.570904	2.6427e-17	2.53448e-14	184	184
NUF2	0.568639	3.75637e-17	3.43878e-14	184	184
C1orf135	0.56694	4.88175e-17	4.11008e-14	184	184
UBE2T	0.566908	4.90553e-17	4.11008e-14	184	184
XRCC2	0.566653	5.10188e-17	4.11008e-14	184	184
LIN9	0.564346	7.26169e-17	5.62502e-14	184	184
RFC5	0.562872	9.0863e-17	6.77771e-14	184	184
NUP37	0.562163	1.01165e-16	7.27664e-14	184	184
PHF5A	0.561583	1.10429e-16	7.41376e-14	184	184
CKS1B	0.561583	1.10433e-16	7.41376e-14	184	184
MSH6	0.56117	1.17524e-16	7.63526e-14	184	184
SKA1	0.56018	1.36428e-16	8.36749e-14	184	184
MCM10	0.560003	1.40107e-16	8.36749e-14	184	184
C12orf48	0.559948	1.41258e-16	8.36749e-14	184	184
TIMELESS	0.558478	1.76069e-16	1.01315e-13	184	184
THOC5	0.556614	2.32434e-16	1.30034e-13	184	184
HAUS8	0.556124	2.49963e-16	1.36061e-13	184	184
NEK2	0.555807	2.61965e-16	1.36509e-13	184	184
NCAPH	0.555746	2.64343e-16	1.36509e-13	184	184
C17orf53	0.555352	2.802e-16	1.41081e-13	184	184
CCDC138	0.554309	3.26845e-16	1.60553e-13	184	184
CENPA	0.55393	3.45644e-16	1.63323e-13	184	184
EXO1	0.55387	3.48703e-16	1.63323e-13	184	184
PSMC3IP	0.553657	3.59796e-16	1.64689e-13	184	184
OIP5	0.549901	6.22908e-16	2.73767e-13	184	184
POLE2	0.549875	6.25287e-16	2.73767e-13	184	184
MSH2	0.548497	7.63477e-16	3.27158e-13	184	184
DKC1	0.547875	8.3522e-16	3.50445e-13	184	184
ADSL	0.544083	1.43816e-15	5.91112e-13	184	184
ACTL6A	0.543291	1.60978e-15	6.4842e-13	184	184
SPC25	0.54176	1.99967e-15	7.89675e-13	184	184
TROAP	0.541134	2.18451e-15	8.46076e-13	184	184
CENPH	0.540701	2.32191e-15	8.82328e-13	184	184
DTL	0.540097	2.52796e-15	9.26796e-13	184	184
RACGAP1	0.540089	2.53097e-15	9.26796e-13	184	184
GPN3	0.5395	2.74905e-15	9.88675e-13	184	184
PRIM2	0.538106	3.34146e-15	1.18065e-12	184	184
TRMT61B	0.537718	3.52731e-15	1.22483e-12	184	184
HMGXB4	0.537589	3.59159e-15	1.22601e-12	184	184
SMARCB1	0.537206	3.78806e-15	1.27153e-12	184	184
CPSF3	0.536972	3.91332e-15	1.29204e-12	184	184
CENPM	0.536211	4.34984e-15	1.413e-12	184	184
TFAP4	0.534634	5.41131e-15	1.7299e-12	184	184
C16orf59	0.533976	5.92535e-15	1.86463e-12	184	184
XRCC6	0.533719	6.13851e-15	1.90199e-12	184	184
KNTC1	0.533415	6.40098e-15	1.95327e-12	184	184
DSCC1	0.531195	8.6757e-15	2.60789e-12	184	184
CDKN3	0.530736	9.23638e-15	2.7356e-12	184	184
UFD1L	0.529572	1.08207e-14	3.1584e-12	184	184
RFC2	0.52832	1.28214e-14	3.6889e-12	184	184
BIRC5	0.528159	1.3103e-14	3.71683e-12	184	184
PCGF6	0.52763	1.40742e-14	3.93686e-12	184	184
EME1	0.525905	1.77494e-14	4.8482e-12	184	184
ORC1L	0.525878	1.78136e-14	4.8482e-12	184	184
MTBP	0.52451	2.13935e-14	5.74486e-12	184	184
CDK4	0.522993	2.61837e-14	6.93867e-12	184	184
SLC25A17	0.520904	3.45276e-14	9.031e-12	184	184
CHAF1B	0.519951	3.91455e-14	1.01076e-11	184	184
CDC7	0.51891	4.48782e-14	1.14372e-11	184	184
RPA1	0.518794	4.55652e-14	1.14372e-11	184	184
ZWILCH	0.518722	4.59987e-14	1.14372e-11	184	184
KIF23	0.5183	4.86129e-14	1.19398e-11	184	184
CDCA3	0.517553	5.35925e-14	1.30043e-11	184	184
FAM72B	0.51622	6.37591e-14	1.5287e-11	184	184
C1orf112	0.515485	7.01371e-14	1.65558e-11	184	184
CSE1L	0.515424	7.06949e-14	1.65558e-11	184	184
CDK2	0.514857	7.60848e-14	1.76132e-11	184	184
RAD51AP1	0.514621	7.84388e-14	1.79518e-11	184	184
RNASEH2A	0.514171	8.31343e-14	1.88126e-11	184	184
MCM4	0.513016	9.64722e-14	2.15883e-11	184	184
CDK1	0.511698	1.14249e-13	2.52853e-11	184	184
SET	0.511598	1.15723e-13	2.52928e-11	184	184
CDCA5	0.511526	1.16794e-13	2.52928e-11	184	184
TIPIN	0.51127	1.20678e-13	2.58558e-11	184	184
HNRNPC	0.510352	1.35682e-13	2.87646e-11	184	184
C11orf82	0.508497	1.71765e-13	3.60349e-11	184	184
RAD54L	0.508182	1.78751e-13	3.71138e-11	184	184
PES1	0.506788	2.13171e-13	4.38089e-11	184	184
DEPDC4	0.503309	3.2964e-13	6.706e-11	184	183
ZNF639	0.502903	3.46731e-13	6.98316e-11	184	184
PRIM1	0.502336	3.72042e-13	7.41874e-11	184	184
SFRS9	0.501633	4.05943e-13	8.01539e-11	184	184
DUT	0.501271	4.24535e-13	8.24713e-11	184	184
MASTL	0.501246	4.2587e-13	8.24713e-11	184	184
TPX2	0.500572	4.62872e-13	8.87832e-11	184	184
FANCI	0.500165	4.86695e-13	9.24721e-11	184	184
The gene signatures positively associated with CHK2 are defined as significantly associated genes (Statistic correlation > 0.5) in ESCA.

## Sheet: S4. ESCA-Negtive 184
Table S4. Gene signatures negtively associated with CHK2 in ESCA
Query	Statistic	P-value	FDR (BH)	Event_SD	Event_TD
S1PR1	-0.350733	1.05492e-06	2.22472e-05	184	184
ZNFX1	-0.350753	1.05333e-06	2.22472e-05	184	184
ISG20	-0.351146	1.02256e-06	2.17509e-05	184	184
MFNG	-0.351152	1.0221e-06	2.17509e-05	184	184
ESAM	-0.351293	1.01124e-06	2.15975e-05	184	184
SNX9	-0.351403	1.0029e-06	2.1442e-05	184	184
HDAC9	-0.35143	1.00083e-06	2.14205e-05	184	184
ATP2A3	-0.351577	9.89784e-07	2.12066e-05	184	184
ACHE	-0.352381	9.31276e-07	2.01244e-05	184	184
BTBD9	-0.352559	9.18823e-07	1.9898e-05	184	184
DOK4	-0.35305	8.85164e-07	1.92727e-05	184	184
SH3BP2	-0.353338	8.65988e-07	1.8937e-05	184	184
CST3	-0.353355	8.6488e-07	1.89333e-05	184	184
CCRL2	-0.353446	8.58904e-07	1.8823e-05	184	184
NBEAL2	-0.353827	8.3435e-07	1.83648e-05	184	184
KLF2	-0.354491	7.93094e-07	1.76301e-05	184	184
DPCR1	-0.354757	7.7714e-07	1.73275e-05	184	165
SELP	-0.355098	7.57145e-07	1.69057e-05	184	184
FAIM3	-0.35538	7.40924e-07	1.65987e-05	184	184
FBXW11	-0.355949	7.09268e-07	1.59912e-05	184	184
VSIG2	-0.357033	6.52535e-07	1.4927e-05	184	178
KCND3	-0.35717	6.45707e-07	1.48284e-05	184	182
SLFN12L	-0.357503	6.29311e-07	1.45181e-05	184	184
INPP4B	-0.357618	6.23756e-07	1.4423e-05	184	184
CLEC14A	-0.357883	6.11097e-07	1.41628e-05	184	184
MUC5B	-0.35789	6.10798e-07	1.41628e-05	184	181
MPRIP	-0.357921	6.09324e-07	1.41543e-05	184	184
C1orf126	-0.358433	5.85635e-07	1.36671e-05	184	184
ZNF211	-0.358789	5.6973e-07	1.33421e-05	184	184
BCAS1	-0.359309	5.47184e-07	1.29043e-05	184	183
FAM126B	-0.359366	5.44763e-07	1.28623e-05	184	184
IL33	-0.359367	5.44738e-07	1.28623e-05	184	184
ACOX3	-0.359719	5.30031e-07	1.25877e-05	184	184
PLEKHM1P	-0.359744	5.29001e-07	1.25786e-05	184	184
ABCA10	-0.359768	5.28013e-07	1.257e-05	184	183
PLK3	-0.359999	5.18604e-07	1.23752e-05	184	184
VWF	-0.360403	5.02518e-07	1.20199e-05	184	184
UNC13D	-0.360428	5.01542e-07	1.20108e-05	184	184
ARHGEF18	-0.360505	4.98565e-07	1.19537e-05	184	184
HLA-DPA1	-0.360534	4.97433e-07	1.19408e-05	184	184
PDCD6IP	-0.360553	4.96697e-07	1.19373e-05	184	184
CDKL5	-0.360662	4.92477e-07	1.185e-05	184	184
MMRN1	-0.361212	4.71758e-07	1.1406e-05	184	184
GCOM1	-0.36168	4.54828e-07	1.10497e-05	184	184
STAT5A	-0.361939	4.45662e-07	1.08796e-05	184	184
ATG4A	-0.362799	4.166e-07	1.02446e-05	184	184
CD74	-0.36334	3.99233e-07	9.92661e-06	184	184
TXK	-0.36388	3.82579e-07	9.52428e-06	184	184
ARL14	-0.364032	3.78039e-07	9.44629e-06	184	180
ZBTB7A	-0.364177	3.73738e-07	9.37371e-06	184	184
EPS8L1	-0.36455	3.62875e-07	9.13538e-06	184	184
BMP2	-0.364689	3.5891e-07	9.04687e-06	184	184
STK10	-0.364835	3.54797e-07	8.9769e-06	184	184
CD24	-0.364924	3.52283e-07	8.9245e-06	184	184
GPBAR1	-0.365054	3.4868e-07	8.86668e-06	184	184
ARHGEF15	-0.365369	3.401e-07	8.6704e-06	184	184
AFF1	-0.36538	3.39806e-07	8.6704e-06	184	184
PPP1R16B	-0.366206	3.18214e-07	8.23757e-06	184	184
AFF4	-0.366425	3.12723e-07	8.1367e-06	184	184
SPATA18	-0.367024	2.98152e-07	7.77822e-06	184	184
IL17RC	-0.367043	2.97697e-07	7.77642e-06	184	184
JAK2	-0.367298	2.91722e-07	7.64014e-06	184	184
PCSK7	-0.367326	2.9105e-07	7.63248e-06	184	184
HSD17B2	-0.367415	2.8899e-07	7.60747e-06	184	184
ABTB1	-0.367546	2.85998e-07	7.54916e-06	184	184
SAMD9L	-0.367564	2.85582e-07	7.54807e-06	184	184
CATSPERB	-0.367635	2.83969e-07	7.51528e-06	184	182
CCDC69	-0.368115	2.73284e-07	7.26115e-06	184	184
GVIN1	-0.369097	2.52587e-07	6.81003e-06	184	184
LIPH	-0.369271	2.49075e-07	6.74244e-06	184	184
KALRN	-0.369781	2.39071e-07	6.48907e-06	184	184
PINK1	-0.369986	2.35157e-07	6.39145e-06	184	184
MGRN1	-0.370126	2.32533e-07	6.33722e-06	184	184
HPGD	-0.370486	2.25871e-07	6.18076e-06	184	184
PIK3CG	-0.371267	2.12067e-07	5.85073e-06	184	184
C10orf54	-0.371738	2.04122e-07	5.68604e-06	184	184
FBXL17	-0.371963	2.00443e-07	5.59906e-06	184	184
ALDH3B1	-0.37232	1.94713e-07	5.46173e-06	184	184
SERTAD1	-0.372395	1.93545e-07	5.43652e-06	184	184
HLA-DRA	-0.372446	1.92734e-07	5.4213e-06	184	184
LYST	-0.372997	1.84303e-07	5.22002e-06	184	184
WBP2	-0.373011	1.84082e-07	5.22002e-06	184	184
C5orf53	-0.373475	1.77256e-07	5.06375e-06	184	184
ZNF836	-0.374905	1.57722e-07	4.55742e-06	184	184
HLA-DPB1	-0.375012	1.56338e-07	4.53696e-06	184	184
HLA-DMB	-0.375891	1.45462e-07	4.24579e-06	184	184
ABLIM3	-0.375968	1.44545e-07	4.22517e-06	184	184
KLF6	-0.376905	1.33826e-07	3.95198e-06	184	184
SIGLEC6	-0.377139	1.31265e-07	3.88205e-06	184	177
TNXB	-0.377156	1.31084e-07	3.88205e-06	184	184
CAPN5	-0.377287	1.29674e-07	3.85198e-06	184	184
SEC14L1	-0.378092	1.21322e-07	3.63604e-06	184	184
MUC1	-0.378224	1.20001e-07	3.60183e-06	184	184
SLCO2A1	-0.378316	1.19096e-07	3.57999e-06	184	184
ZNF366	-0.379158	1.11058e-07	3.34837e-06	184	184
TNFRSF14	-0.380014	1.03427e-07	3.16567e-06	184	184
PARP15	-0.380256	1.01365e-07	3.11202e-06	184	184
PYGB	-0.380906	9.601e-08	2.97483e-06	184	184
ANTXR2	-0.381031	9.5013e-08	2.95759e-06	184	184
PHACTR2	-0.381912	8.82627e-08	2.77752e-06	184	184
INPP5D	-0.383389	7.79602e-08	2.48044e-06	184	184
SH3RF1	-0.383701	7.59379e-08	2.42375e-06	184	184
VNN2	-0.384745	6.95229e-08	2.23316e-06	184	183
EHD1	-0.385335	6.61376e-08	2.14494e-06	184	184
GIMAP6	-0.385417	6.56777e-08	2.13347e-06	184	184
AMICA1	-0.38577	6.37397e-08	2.07721e-06	184	184
RASSF6	-0.386238	6.1256e-08	2.00928e-06	184	184
C16orf54	-0.387024	5.72884e-08	1.9008e-06	184	184
S1PR4	-0.387565	5.47032e-08	1.82716e-06	184	184
RAPGEF2	-0.387984	5.27764e-08	1.76898e-06	184	184
PTPRB	-0.388914	4.87378e-08	1.64971e-06	184	184
PNPLA7	-0.38909	4.80053e-08	1.62765e-06	184	184
TMEM175	-0.38937	4.68633e-08	1.597e-06	184	184
GAK	-0.390177	4.3722e-08	1.50781e-06	184	184
SLC9A1	-0.390957	4.0874e-08	1.42917e-06	184	184
CTSS	-0.391748	3.8171e-08	1.34871e-06	184	184
NFATC2	-0.39197	3.74448e-08	1.32771e-06	184	184
PDZK1IP1	-0.392122	3.69555e-08	1.31367e-06	184	184
TRAK1	-0.392731	3.50514e-08	1.25611e-06	184	184
TMEM127	-0.39286	3.46619e-08	1.24437e-06	184	184
GRK5	-0.392994	3.4258e-08	1.2338e-06	184	184
SPNS2	-0.394228	3.07666e-08	1.12254e-06	184	184
HLA-DMA	-0.394476	3.01053e-08	1.10845e-06	184	184
JAK1	-0.39642	2.5388e-08	9.53945e-07	184	184
MICAL1	-0.397085	2.3943e-08	9.11553e-07	184	184
CPEB3	-0.397499	2.30849e-08	8.85198e-07	184	184
FAM107A	-0.398707	2.07454e-08	8.03486e-07	184	184
PLEKHM1	-0.39939	1.95262e-08	7.63612e-07	184	184
TMEM100	-0.400521	1.76552e-08	6.99954e-07	184	180
DUSP4	-0.400765	1.72756e-08	6.88972e-07	184	184
DMXL1	-0.40411	1.2796e-08	5.31362e-07	184	184
ANXA3	-0.404192	1.27014e-08	5.30717e-07	184	184
TADA2B	-0.404509	1.23432e-08	5.19694e-07	184	184
ABCA8	-0.406508	1.02973e-08	4.40315e-07	184	176
ALS2CL	-0.407499	9.40858e-09	4.10149e-07	184	184
SECISBP2L	-0.409275	7.99713e-09	3.59113e-07	184	184
STX12	-0.409348	7.94367e-09	3.58273e-07	184	184
SLMAP	-0.410183	7.35695e-09	3.33893e-07	184	184
PDE2A	-0.411365	6.59712e-09	3.04738e-07	184	184
FYCO1	-0.412383	6.0038e-09	2.81857e-07	184	184
PDK4	-0.412854	5.74696e-09	2.72981e-07	184	184
TGFBR2	-0.413159	5.58645e-09	2.66969e-07	184	184
C1orf116	-0.414592	4.8884e-09	2.38962e-07	184	184
FGD4	-0.415275	4.58597e-09	2.26932e-07	184	184
INPP1	-0.415719	4.39898e-09	2.18754e-07	184	184
COL4A3BP	-0.416963	3.91401e-09	1.98061e-07	184	184
IL6ST	-0.418347	3.43485e-09	1.77696e-07	184	184
ZFP36L2	-0.418533	3.37478e-09	1.75176e-07	184	184
ERN1	-0.419148	3.18393e-09	1.66462e-07	184	184
CALCOCO2	-0.419509	3.07682e-09	1.62218e-07	184	184
SEC24A	-0.421123	2.63876e-09	1.41342e-07	184	184
IL4R	-0.421498	2.54591e-09	1.36732e-07	184	184
MGLL	-0.422911	2.22371e-09	1.2406e-07	184	184
KAT2B	-0.423379	2.12604e-09	1.19939e-07	184	184
FEM1C	-0.423773	2.04703e-09	1.16461e-07	184	184
SDCBP2	-0.42473	1.86657e-09	1.07715e-07	184	184
MVP	-0.425189	1.7857e-09	1.03642e-07	184	184
CPEB4	-0.426445	1.58107e-09	9.20313e-08	184	184
PEAR1	-0.427313	1.45307e-09	8.53204e-08	184	184
PTPRE	-0.428976	1.23535e-09	7.37316e-08	184	184
FCHO2	-0.429981	1.11941e-09	6.83182e-08	184	184
MMRN2	-0.430475	1.06634e-09	6.54759e-08	184	184
QSOX1	-0.431985	9.18815e-10	5.67636e-08	184	184
FNIP2	-0.432351	8.86208e-10	5.56019e-08	184	184
YPEL2	-0.433826	7.65548e-10	4.89464e-08	184	184
ACOX1	-0.434073	7.46981e-10	4.80645e-08	184	184
C10orf128	-0.438406	4.8382e-10	3.26984e-08	184	182
KIF13B	-0.438802	4.64857e-10	3.18897e-08	184	184
AKAP13	-0.440932	3.74525e-10	2.68432e-08	184	184
TNIP1	-0.444557	2.58405e-10	1.96388e-08	184	184
LRP10	-0.449307	1.57847e-10	1.25678e-08	184	184
HERC3	-0.452245	1.15927e-10	9.52968e-09	184	184
CSRNP1	-0.456028	7.75601e-11	6.76217e-09	184	184
SNRK	-0.456935	7.03868e-11	6.25534e-09	184	184
PCDH1	-0.460259	4.91942e-11	4.78634e-09	184	184
ADD1	-0.4612	4.44189e-11	4.4287e-09	184	184
MYO18A	-0.463467	3.46865e-11	3.54612e-09	184	184
SGMS2	-0.463775	3.35352e-11	3.44591e-09	184	184
TMBIM1	-0.465608	2.74163e-11	2.89091e-09	184	184
CFLAR	-0.476601	7.98399e-12	1.00498e-09	184	184
TCTEX1D4	-0.482862	3.87601e-12	5.53165e-10	184	184
HLA-E	-0.483304	3.68119e-12	5.34968e-10	184	184
KIAA0513	-0.49485	9.32081e-13	1.66125e-10	184	184
RAPGEF3	-0.495649	8.45947e-13	1.52119e-10	184	184
The gene signatures positively associated with CHK2 are defined as significantly associated genes (Statistic correlation < -0.35) in ESCA.

## Sheet: S5. Overlap-Positive37
Table S5. Gene signatures positively associated with CHK2 in both HNSC and ESCA
Gene name
AURKB
C16orf59
C17orf53
C1orf112
C21orf45
CDC45
CDCA3
CDK1
CDK4
CENPH
CENPM
CKS1B
DRG1
DSCC1
DUT
EME1
FAM72B
HAUS8
HSCB
MCM5
NEK2
NUF2
OIP5
PHF5A
PSMC3IP
RAD51
RAD54B
RAD54L
RANBP1
RFC2
RFC4
RNASEH2A
SMARCB1
SNRPD3
SPC25
TROAP
UBE2T

## Sheet: S6. Overlap-Negtive25
Table S6. Gene signatures negtively associated with CHK2 in both HNSC and ESCA
Gene name
TADA2B
ANTXR2
NFATC2
RAPGEF2
LYST
EHD1
KIAA0513
SEC24A
SLC9A1
PINK1
INPP4B
AFF4
PTPRE
LRP10
PDCD6IP
HERC3
JAK1
ZNFX1
FYCO1
SGMS2
FNIP2
ADD1
CPEB4
TGFBR2
MYO18A
